# Supplementary material for: Association of Cerebrospinal Fluid Tumor DNA Genotyping With Survival Among Patients With Lung Adenocarcinoma and Central Nervous System Metastases
Source: PubMed Central journal article supplement (PMC7403922; doi:10.1001/jamanetworkopen.2020.9077), 2020-08-04

## Supplementary Online Content

Li Y-S, Zheng M-M, Jiang B-Y, et al. Association of cerebrospinal fluid tumor DNA genotyping with survival among patients with lung adenocarcinoma and central nervous system metastases. *JAMA Netw Open*. 2020;3(8):e209077.  
doi:10.1001/jamanetworkopen.2020.9077

**eFigure.** Genetic Alteration Profile of Cerebrospinal Fluid Tumor DNA From All Included Patients (N = 94)

This supplementary material has been provided by the authors to give readers additional information about their work.

**eFigure.** Genetic Alteration Profile of Cerebrospinal Fluid Tumor DNA From All Included Patients (N = 94)

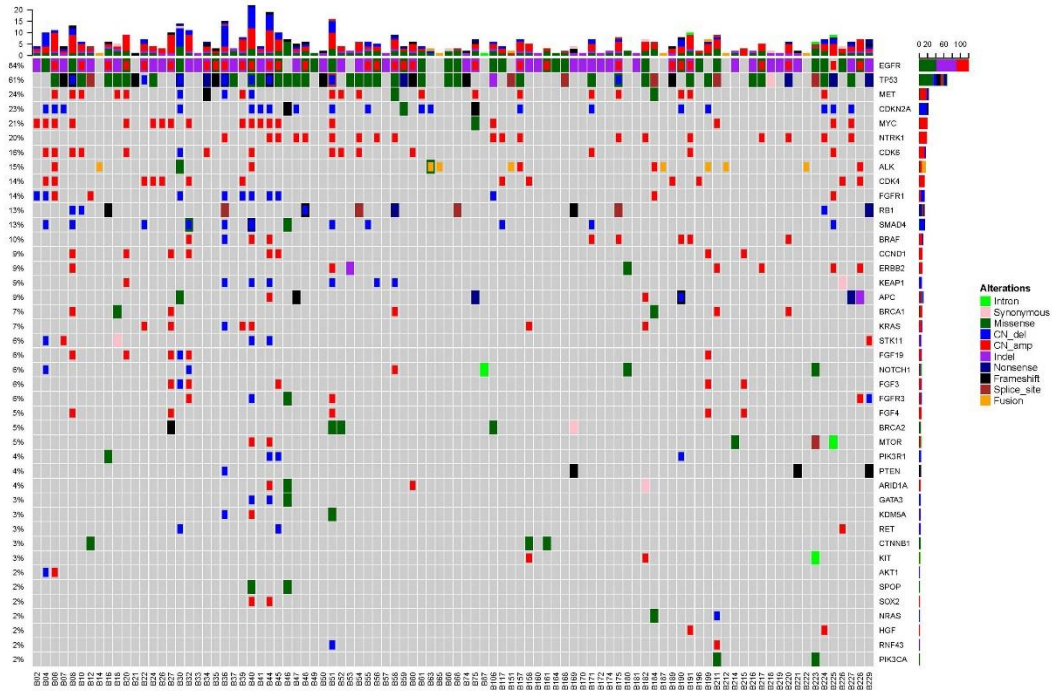

Supplement: jamanetwopen-3-e209077-s001.pdf [file jamanetwopen-3-e209077-s001.pdf]
